# Supplementary figures and images for: 3D printed polycaprolactone/beta-tricalcium phosphate/magnesium peroxide oxygen releasing scaffold enhances osteogenesis and implanted BMSCs survival in repairing the large bone defect
Source: Royal Society of Chemistry journal article supplement (doi:10.1039/d1tb00178g), 2021-01-01

(a)

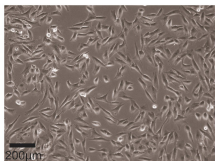

(b)

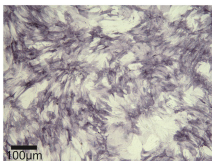

(c)

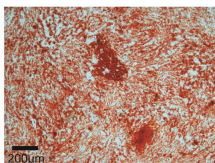

(d)

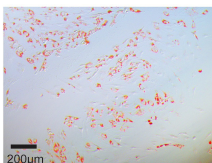

(e)

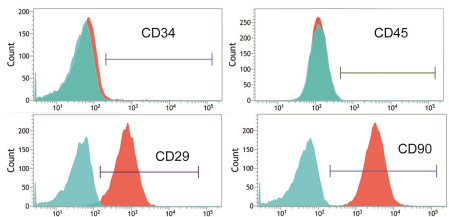

(f)

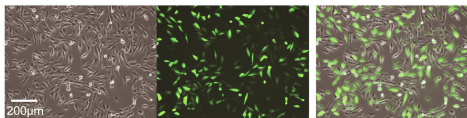

Supplement: d1tb00178g1.pdf [file d1tb00178g1.pdf]

(a)

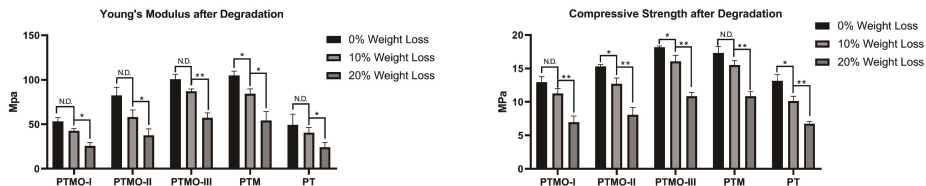

(b)

4 weeks

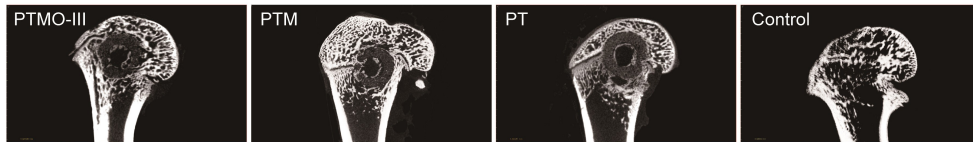

12 weeks

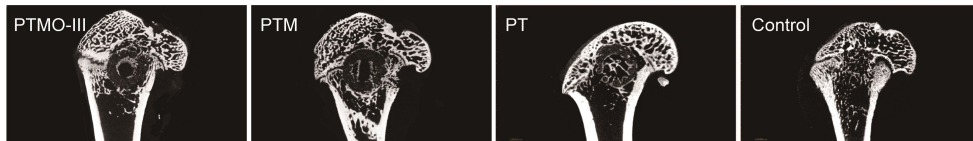

Supplement: d1tb00178g2.pdf [file d1tb00178g2.pdf]

(a)

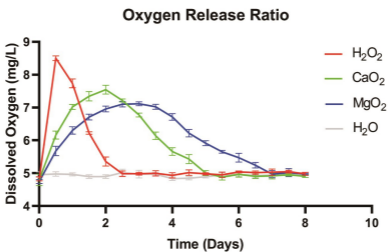

(b)

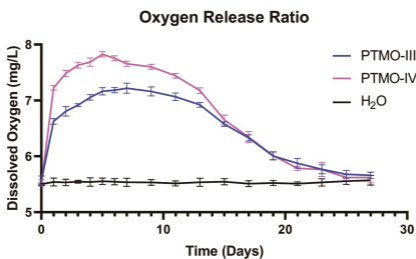

(c)

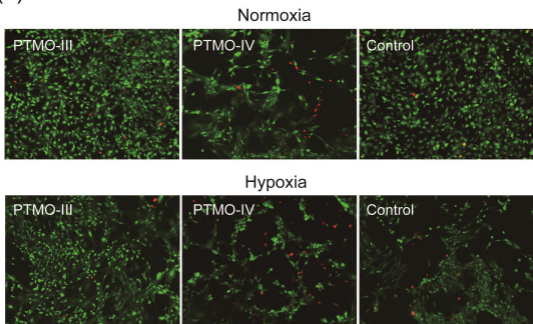

(d)

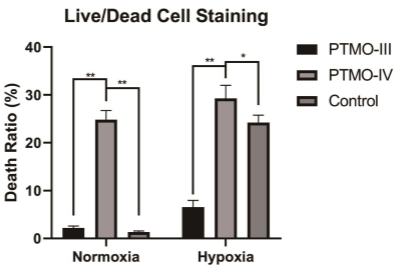

(e)

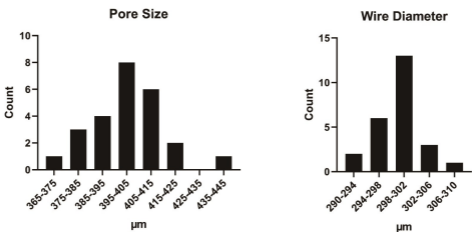

Supplement: d1tb00178g3.pdf [file d1tb00178g3.pdf]
